# Supplementary material
Source: PubMed Central journal article supplement (PMC7610458)

## Supplementary Material

**Supplementary Table 1.** Relaxation delays for measuring  $T_1$  and  $T_2$  relaxation times<sup>1</sup>

| Relaxation delays                              |      |                                               |        |
|------------------------------------------------|------|-----------------------------------------------|--------|
| $T_1$ [ms] (pulse program<br>hsqct1etf3gpsi.2) |      | $T_2$ [ms] ( pulse program<br>hsqct2etf3gpsi) |        |
| 20                                             | 500  | 8.48                                          | 84.8   |
| 40                                             | 640  | 16.96                                         | 101.76 |
| 80                                             | 800  | 25.44                                         | 118.72 |
| 160                                            | 1200 | 33.92                                         | 135.68 |
| 250                                            | 1500 | 42.4                                          | 169.6  |
| 320                                            | 2000 | 50.88                                         | 203.52 |
|                                                |      | 68.84                                         | 220.48 |
|                                                |      | 137.44                                        |        |

**Supplementary Table 2.** List of long-range NOE distance restraints obtained from a <sup>15</sup>N NOESY-HSQC experiment at 950 MHz used in CYANA calculations.

| Res. Num.1 | Res. Type | Atom | Res. Num. 2 | Res. Type | Atom | max. dist (Å) |
|------------|-----------|------|-------------|-----------|------|---------------|
| 254        | ALA       | H    | 297         | ALA       | HB   | 5.00          |
| 258        | LEU       | H    | 293         | ALA       | HB   | 5.00          |
| 296        | GLU       | H    | 327         | ALA       | HA   | 5.50          |
| 298        | GLN       | H    | 297         | ALA       | H    | 5.00          |
| 343        | ALA       | HB   | 273         | ARG       | HG   | 5.00          |
| 290        | ILE       | H    | 258         | LEU       | HA   | 5.00          |
| 317        | ALA       | H    | 310         | GLU       | HG   | 5.00          |
| 304        | ARG       | HD   | 251         | LEU       | HD   | 6.00          |
| 300        | LEU       | H    | 248         | LEU       | HD   | 6.00          |
| 327        | ALA       | HA   | 296         | GLU       | HB   | 5.00          |
| 234        | ARG       | HD   | 247         | ASP       | HB   | 5.00          |
| 293        | ALA       | HB   | 261         | LEU       | HD   | 6.50          |
| 280        | VAL       | HG1  | 269         | GLN       | H    | 5.00          |
| 300        | LEU       | HA   | 251         | LEU       | HD   | 5.00          |
| 274        | THR       | H    | 339         | SER       | HA   | 5.00          |
| 293        | ALA       | H    | 261         | LEU       | HD   | 5.00          |
| 300        | LEU       | HG   | 324         | VAL       | HG2  | 5.50          |
| 261        | LEU       | HD   | 293         | ALA       | HA   | 5.00          |
| 258        | LEU       | HB   | 290         | ILE       | HD1  | 5.00          |
| 297        | ALA       | H    | 254         | ALA       | HB   | 5.00          |
| 290        | ILE       | HG2  | 261         | LEU       | HB   | 5.50          |
| 258        | LEU       | HA   | 290         | ILE       | HD1  | 5.00          |
| 300        | LEU       | HB   | 251         | LEU       | HD   | 5.00          |
| 297        | ALA       | HB   | 251         | LEU       | HD   | 5.00          |
| 251        | LEU       | HG   | 300         | LEU       | HA   | 5.00          |
| 251        | LEU       | HA   | 300         | LEU       | HA   | 5.50          |
| 280        | VAL       | HG1  | 268         | ALA       | HB   | 5.00          |
| 251        | LEU       | HG   | 300         | LEU       | H    | 5.00          |
| 272        | HIS       | HA   | 341         | TRP       | HE1  | 5.00          |

**Supplementary Table 3. NMR and refinement statistics for protein structures**

|                                              | Protein        |
|----------------------------------------------|----------------|
| <b>NMR distance and dihedral constraints</b> |                |
| Distance constraints                         |                |
| Total NOE                                    | 57             |
| Intra-residue                                | 0              |
| Inter-residue                                | 57             |
| Sequential ( $ i-j  = 1$ )                   | 3              |
| Medium-range ( $ i-j  < 4$ )                 | 18             |
| Long-range ( $ i-j  > 5$ )                   | 36             |
| Intermolecular                               | 0              |
| Hydrogen bonds                               | 118            |
| Total dihedral angle restraints              | 136            |
| $\phi$                                       | 68             |
| $\psi$                                       | 68             |
| <b>Structure statistics</b>                  |                |
| Violations (mean and s.d.)                   |                |
| Distance constraints (Å)                     | 0.068 ± 0.0086 |
| Dihedral angle constraints (°)               | 0              |
| Max. dihedral angle violation (°)            | 0              |
| Max. distance constraint violation (Å)       | 2.1            |
| Deviations from idealized geometry           |                |
| Bond lengths (Å)                             | 0.001          |
| Bond angles (°)                              | 0.2            |
| Average pairwise r.m.s. deviation** (Å)      |                |
| Heavy                                        | 0.7            |
| Backbone                                     | 1.4            |

\*\*Pairwise r.m.s. deviation was calculated among 20 refined structures.

**Supplementary Table 4.** Exact p values for statistical analyses in Figure 4 using Student's two-tailed t-test.

| <b>Figure 4a</b>                               |                          |                          |                                                |                        |                          |
|------------------------------------------------|--------------------------|--------------------------|------------------------------------------------|------------------------|--------------------------|
| Left                                           |                          |                          | Right                                          |                        |                          |
| <b>Comparison</b>                              | <b>p Value<br/>190 s</b> | <b>p Value<br/>230 s</b> | <b>Comparison</b>                              | <b>p Value<br/>0 s</b> | <b>p Value<br/>190 s</b> |
| <i>WT vs. I290S + A293S</i>                    | 0.03418                  | 0.23389                  | <i>WT vs. I290S + A293S</i>                    | 0.22306                | 0.03418                  |
| <i>WT vs. I290S + A293S + R304W</i>            | 0.24246                  | 0.3214                   | <i>WT vs. I290S + A293S + R304W</i>            | 0.54922                | 0.24247                  |
| <i>WT vs. R304W</i>                            | 0.91754                  | 0.9666                   | <i>WT vs. R304W</i>                            | 8.13188E-20            | 0.91755                  |
| <i>I290S + A293S vs. I290S + A293S + R304W</i> | 0.0029                   | 0.0436                   | <i>I290S + A293S vs. I290S + A293S + R304W</i> | 0.54753                | 0.0029                   |
| <i>I290S + A293S vs. R304W</i>                 | 0.01996                  | 0.23038                  | <i>I290S + A293S vs. R304W</i>                 | 5.67997E-19            | 0.01996                  |
| <i>I290S + A293S + R304W vs. R304W</i>         | 0.27889                  | 0.35313                  | <i>I290S + A293S + R304W vs. R304W</i>         | 2.86134E-17            | 0.27889                  |
| <b>Figure 4b</b>                               |                          |                          |                                                |                        |                          |
| Left                                           |                          |                          | Right                                          |                        |                          |
| <b>Comparison</b>                              | <b>p Value<br/>190 s</b> |                          | <b>Comparison</b>                              | <b>p Value<br/>0 s</b> | <b>p Value<br/>190 s</b> |
| <i>WT vs. L300S + L303S</i>                    | 0.00605                  |                          | <i>WT vs. L300S + L303S</i>                    | 0.50748                | 0.00605                  |
| <i>WT vs. L300S + L303S + R304W</i>            | 0.0098                   |                          | <i>WT vs. L300S + L303S + R304W</i>            | 0.1163                 | 0.0098                   |
| <i>WT vs. R304W</i>                            | 0.3108                   |                          | <i>WT vs. R304W</i>                            | 3.57135E-13            | 0.31079                  |
| <i>L300S + L303S vs. L300S + L303S + R304W</i> | 0.77911                  |                          | <i>L300S + L303S vs. L300S + L303S + R304W</i> | 0.33739                | 0.77911                  |
| <i>L300S + L303S vs. R304W</i>                 | 0.02982                  |                          | <i>L300S + L303S vs. R304W</i>                 | 2.81665E-12            | 0.02982                  |
| <i>L300S + L303S + R304W vs. R304W</i>         | 0.05119                  |                          | <i>L300S + L303S + R304W vs. R304W</i>         | 2.81664E-12            | 0.05119                  |

**Supplementary Table 5.** Exact p values for statistical analyses in Figure 5 using Student's two-tailed t-test.

| Figure 5a                                      |             | Figure 5b                                |            | Figure 5c                                      |            |
|------------------------------------------------|-------------|------------------------------------------|------------|------------------------------------------------|------------|
| Comparison                                     | p Value     | Comparison                               | p Value    | Comparison                                     | p Value    |
| <i>WT vs. I290S + A293S</i>                    | 5.31461E-7  | <i>WT PM vs. Cyto</i>                    | 4.55539E-6 | <i>WT vs. I290S + A293S</i>                    | 2.22052E-4 |
| <i>WT vs. I290S + A293S + R304W</i>            | 2.89604E-11 | <i>I290S + A293S PM vs. Cyto</i>         | 2.04509E-5 | <i>WT vs. I290S + A293S + R304W</i>            | 0.0073     |
| <i>WT vs. R304W</i>                            | 3.24268E-28 | <i>I290S + A293S + R304W PM vs. Cyto</i> | 1.11904E-7 | <i>WT vs. R304W</i>                            | 0.98932    |
| <i>I290S + A293S vs. I290S + A293S + R304W</i> | 0.12731     | <i>R304W PM vs. Cyto</i>                 | 0.45371    | <i>I290S + A293S vs. I290S + A293S + R304W</i> | 0.11358    |
| <i>I290S + A293S vs. R304W</i>                 | 5.7787E-22  |                                          |            | <i>I290S + A293S vs. R304W</i>                 | 2.74836E-4 |
| <i>I290S + A293S + R304W vs. R304W</i>         | 3.10574E-25 |                                          |            | <i>I290S + A293S + R304W vs. R304W</i>         | 0.01746    |
| Figure 5d                                      |             | Figure 5e                                |            | Figure 5f                                      |            |
| Comparison                                     | p Value     | Comparison                               | p Value    | Comparison                                     | p Value    |
| <i>WT vs. L300S + L303S</i>                    | 1.67348E-21 | <i>WT PM vs. Cyto</i>                    | 8.33265E-6 | <i>WT vs. L300S + L303S</i>                    | 0.01807    |
| <i>WT vs. L300S + L303S + R304W</i>            | 9.24136E-32 | <i>L300S + L303S PM vs. Cyto</i>         | 6.35422E-4 | <i>WT vs. L300S + L303S + R304W</i>            | 0.04448    |
| <i>WT vs. R304W</i>                            | 2.0318E-76  | <i>L300S + L303S + R304W PM vs. Cyto</i> | 9.74467E-4 | <i>WT vs. R304W</i>                            | 0.86454    |
| <i>L300S + L303S vs. L300S + L303S + R304W</i> | 0.01997     | <i>R304W PM vs. Cyto</i>                 | 0.32921    | <i>L300S + L303S vs. L300S + L303S + R304W</i> | 0.75196    |
| <i>L300S + L303S vs. R304W</i>                 | 5.59361E-53 |                                          |            | <i>L300S + L303S vs. R304W</i>                 | 0.00984    |
| <i>L300S + L303S + R304W vs. R304W</i>         | 1.73199E-54 |                                          |            | <i>L300S + L303S + R304W vs. R304W</i>         | 0.02697    |

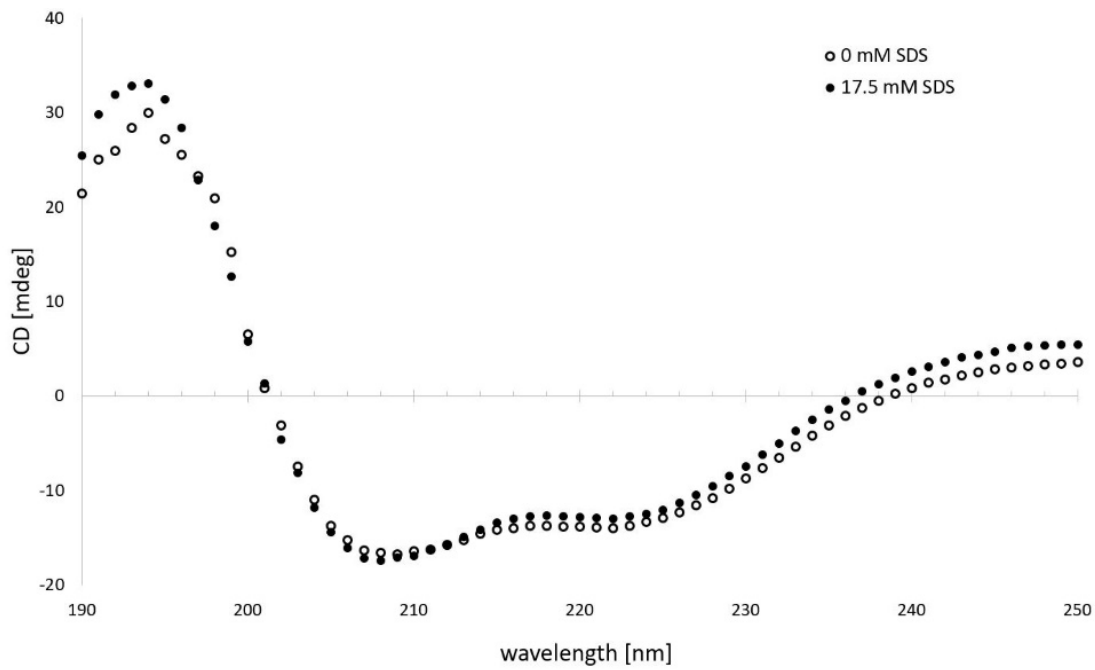

**Supplementary Fig. 1** The CD spectra of 40  $\mu\text{M}$  STIM1 CC1 WT without (open black circles) and after addition (close black circles) of 17.5 mM (0.5%) SDS detergent.

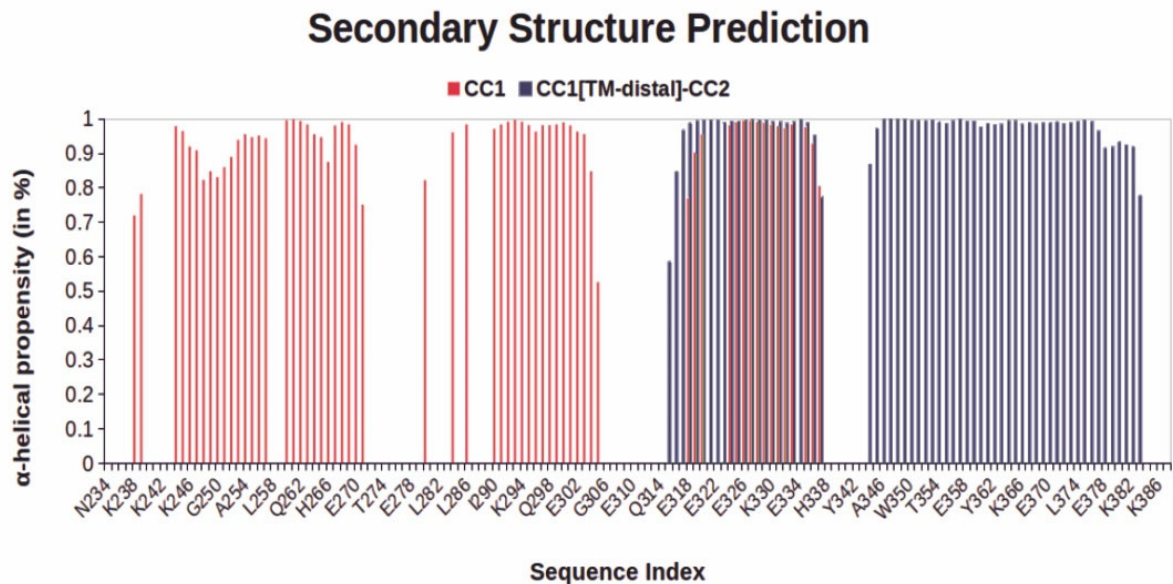

**Supplementary Fig. 2.** TalosN <sup>2</sup> secondary structure predictions for CC1 STIM1 and previously published CC1<sub>[TM-distal]</sub>-CC2 STIM1 fragments.<sup>3</sup>

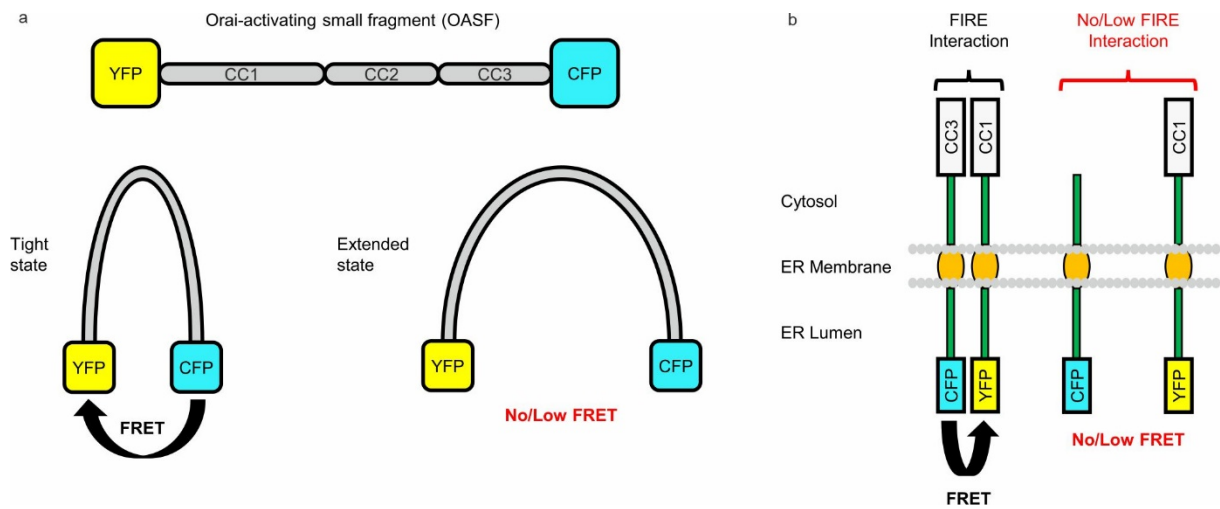

**Supplementary Fig. 3. (a)** YFP-OASF-CFP conformational sensor primary structure together with simplified depictions of a tight (intramolecular FRET) and an extended state (No/Low intramolecular FRET). **(b)** Schematic representation of the FIRE system showing how intermolecular FRET is occurring. A control experiment lacking FIRE interaction is indicated on the right.

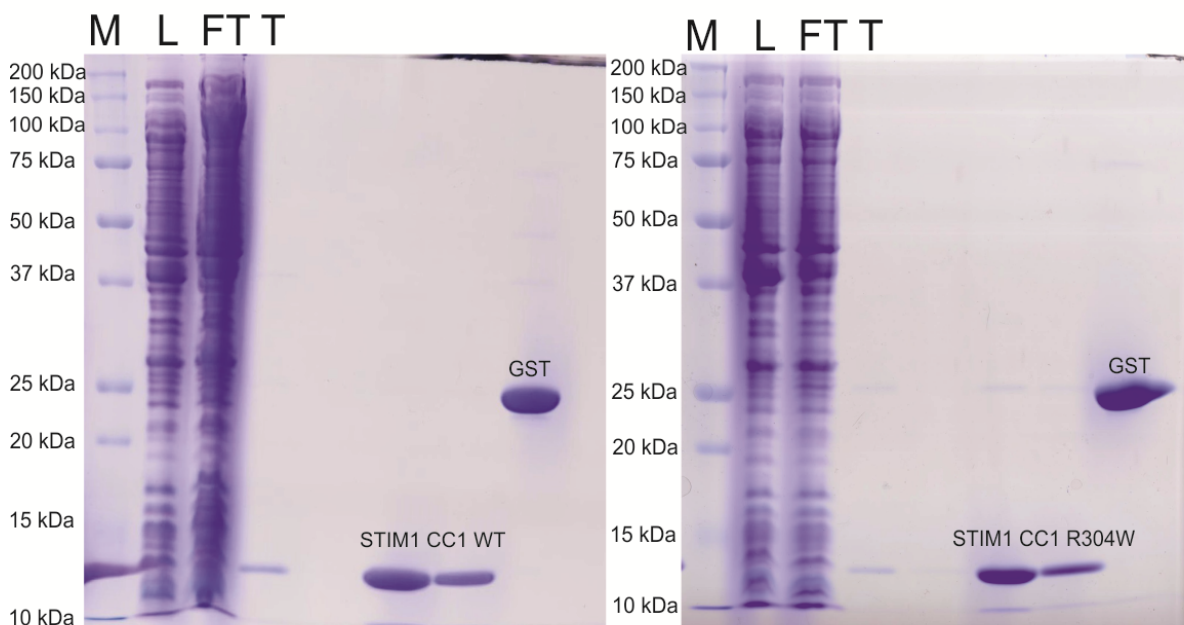

**Supplementary Fig. 4.** SDS-PAGE monitoring of STIM1 CC1 WT (left) and R304W (right) purifications. M – molecular marker, L – crude lysate (GST-CC1 fusion~ 37 kDa). FT – flow through fraction, T – losses during the on-column thrombin cleavage, GST – cleaved GST-tag. The protein samples were expressed and purified according to our previously published protocol. <sup>4</sup> Each gel has been repeated at least 5 times with independent preparations.

1. Palmer AG, 3<sup>rd</sup>. Nmr probes of molecular dynamics: overview and comparison with other techniques. *Annual review of biophysics and biomolecular structure* **30**, 129-155 (2001).
2. Shen Y, Bax A. Protein backbone and sidechain torsion angles predicted from NMR chemical shifts using artificial neural networks. *Journal of Biomolecular NMR* **56**, 227-241 (2013).
3. Stathopoulos PB, *et al.* STIM1/Orai1 coiled-coil interplay in the regulation of store-operated calcium entry. *Nat Commun* **4**, 2963 (2013).
4. Rathner P, Stadlbauer M, Romanin C, Fahrner M, Derler I, Müller N. Rapid NMR-scale purification of <sup>(15)</sup>N,<sup>(13)</sup>C isotope-labeled recombinant human STIM1 coiled coil fragments. *Protein Expr Purif* **146**, 45-50 (2018).



Supplementary Fig. 5

15N 13C STIM1 CC1 WT 02.08.2016  
unprocessed gel to Supplementary Figure 4 left

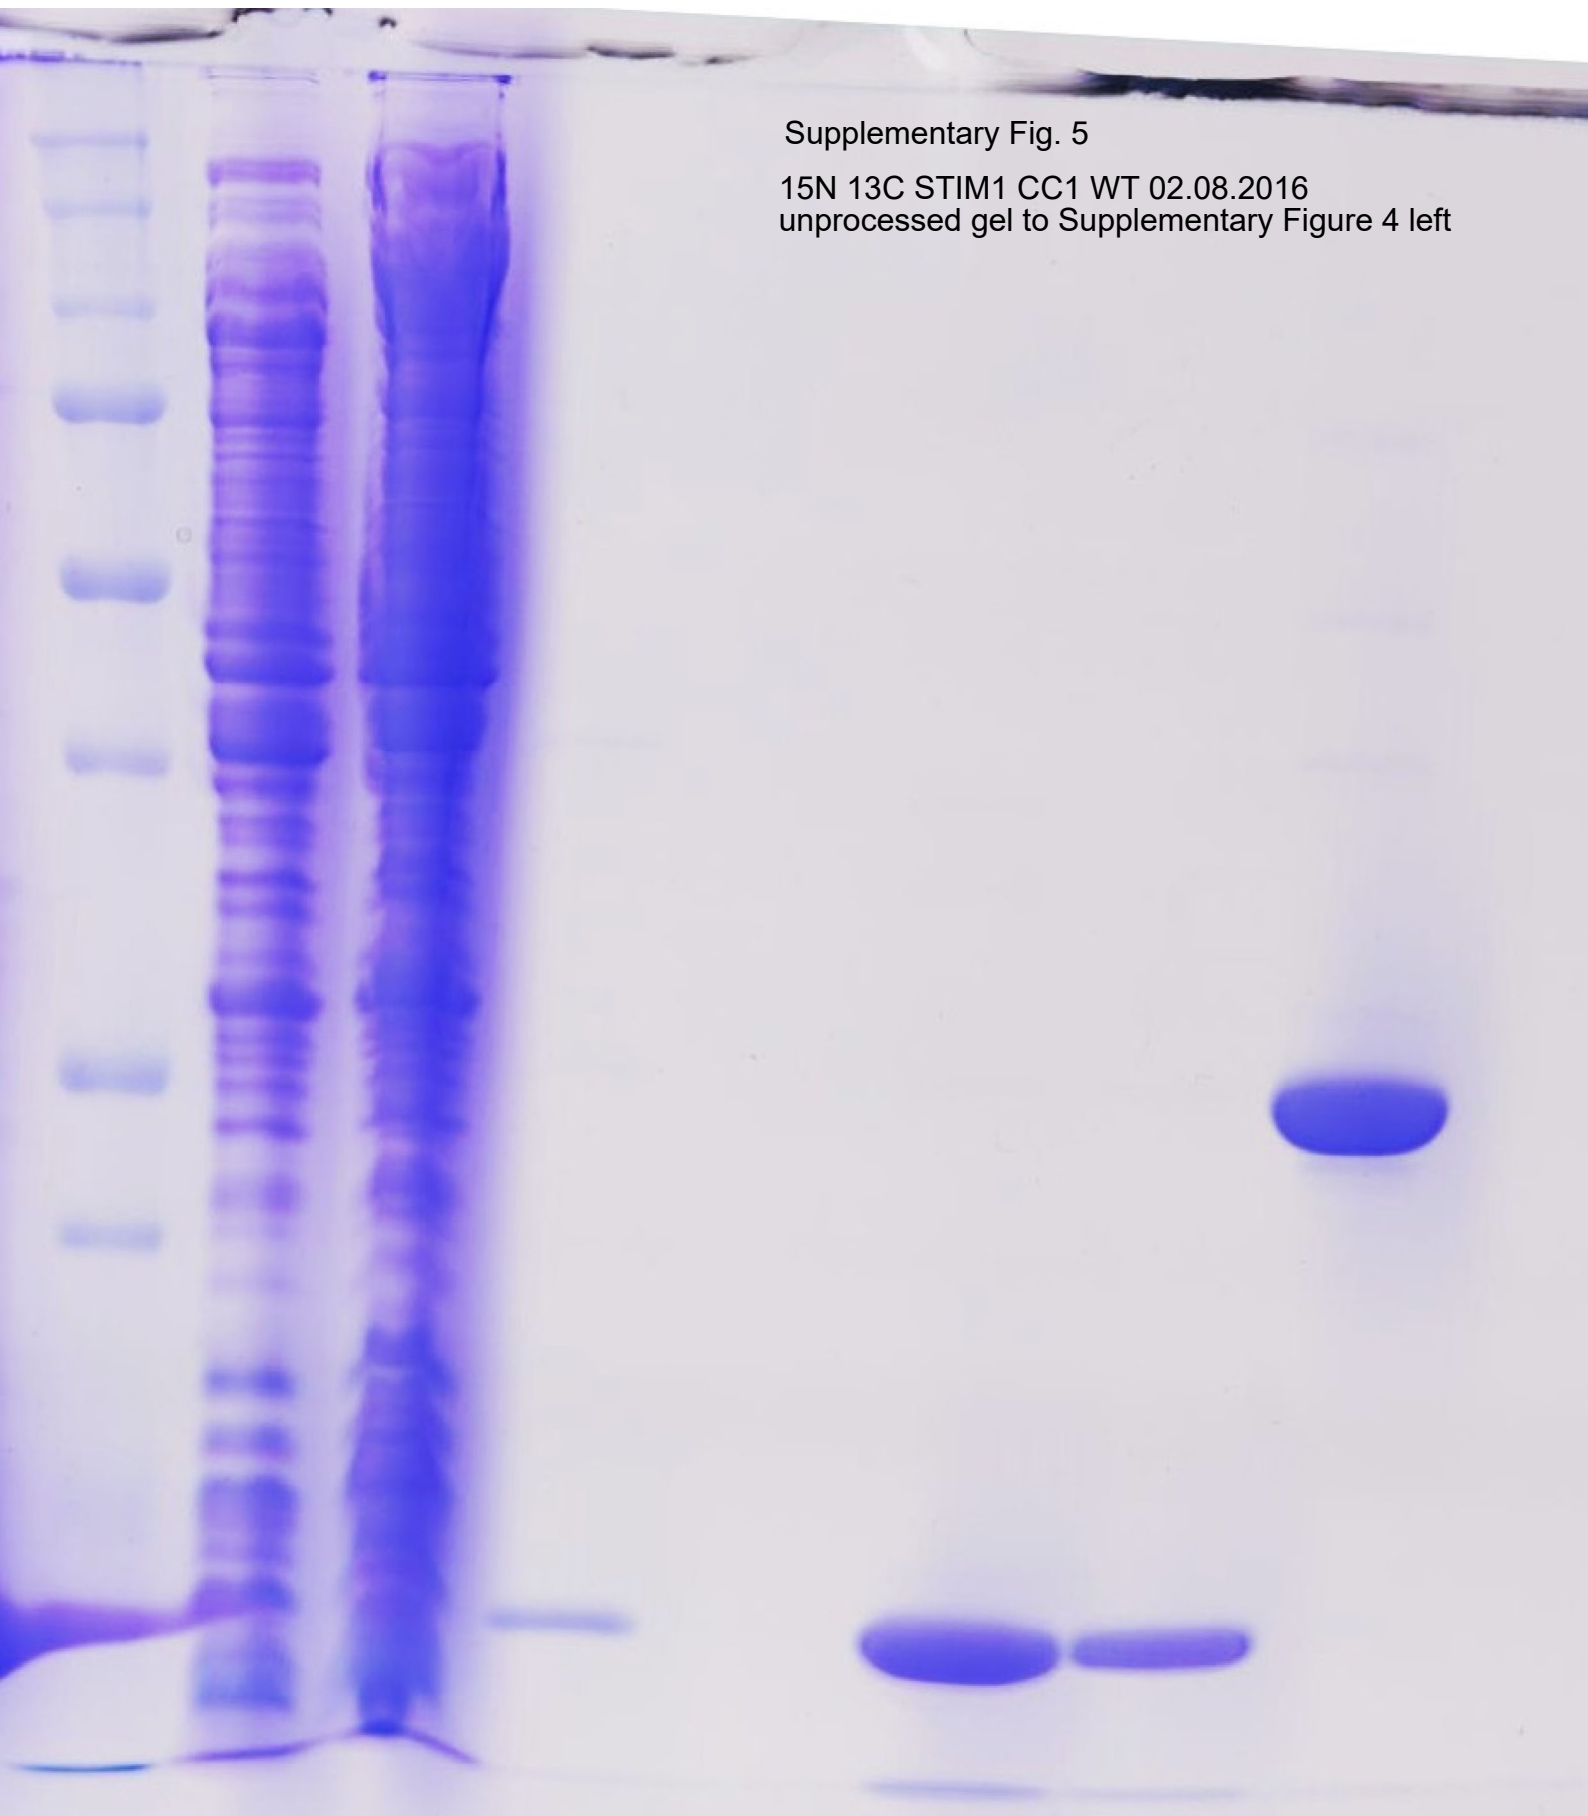

Supplementary Fig. 6

15N 13C STIM1 CC1 R304W 07.07.2016  
unprocessed gel to Supplementary Figure 4 right

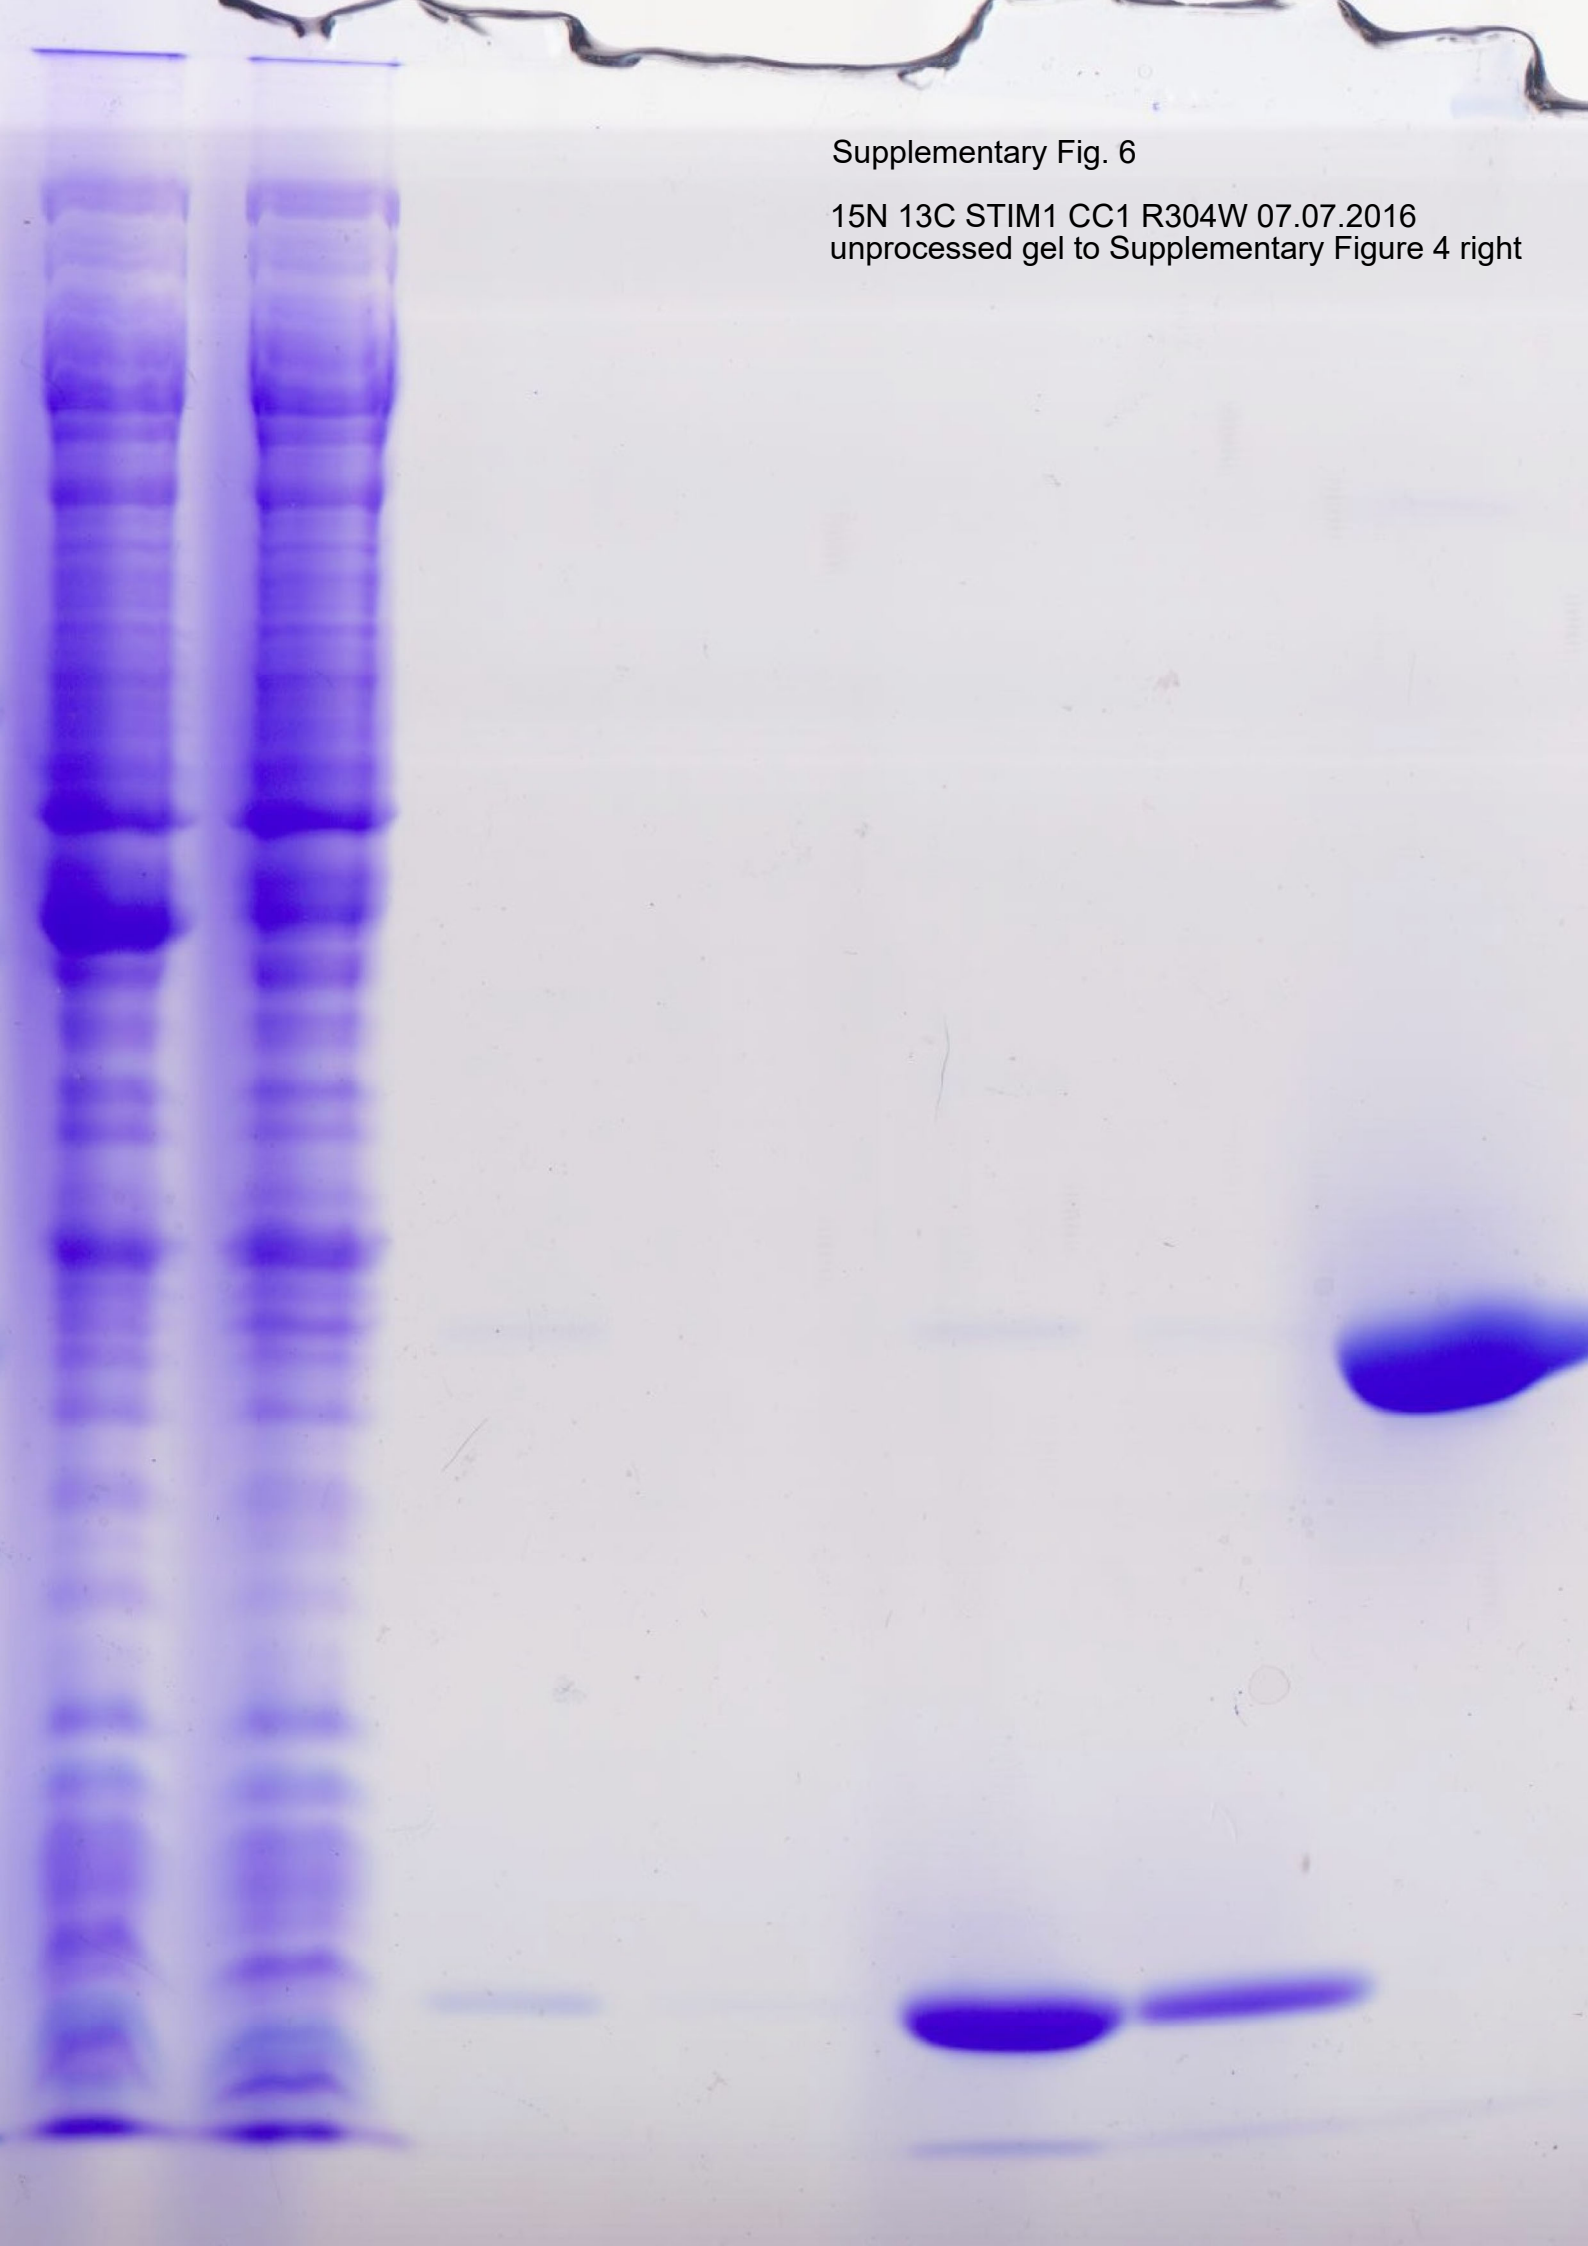

Supplement: EMS118356-supplement-Supplementary_Information.pdf [file EMS118356-supplement-Supplementary_Information.pdf]
